# Supplementary material
Source: Springer Nature journal article supplement (https://www.springermedizin.de/resource/supplementary/12943_2011_991_MOESM6_ESM.pdf/9552206)

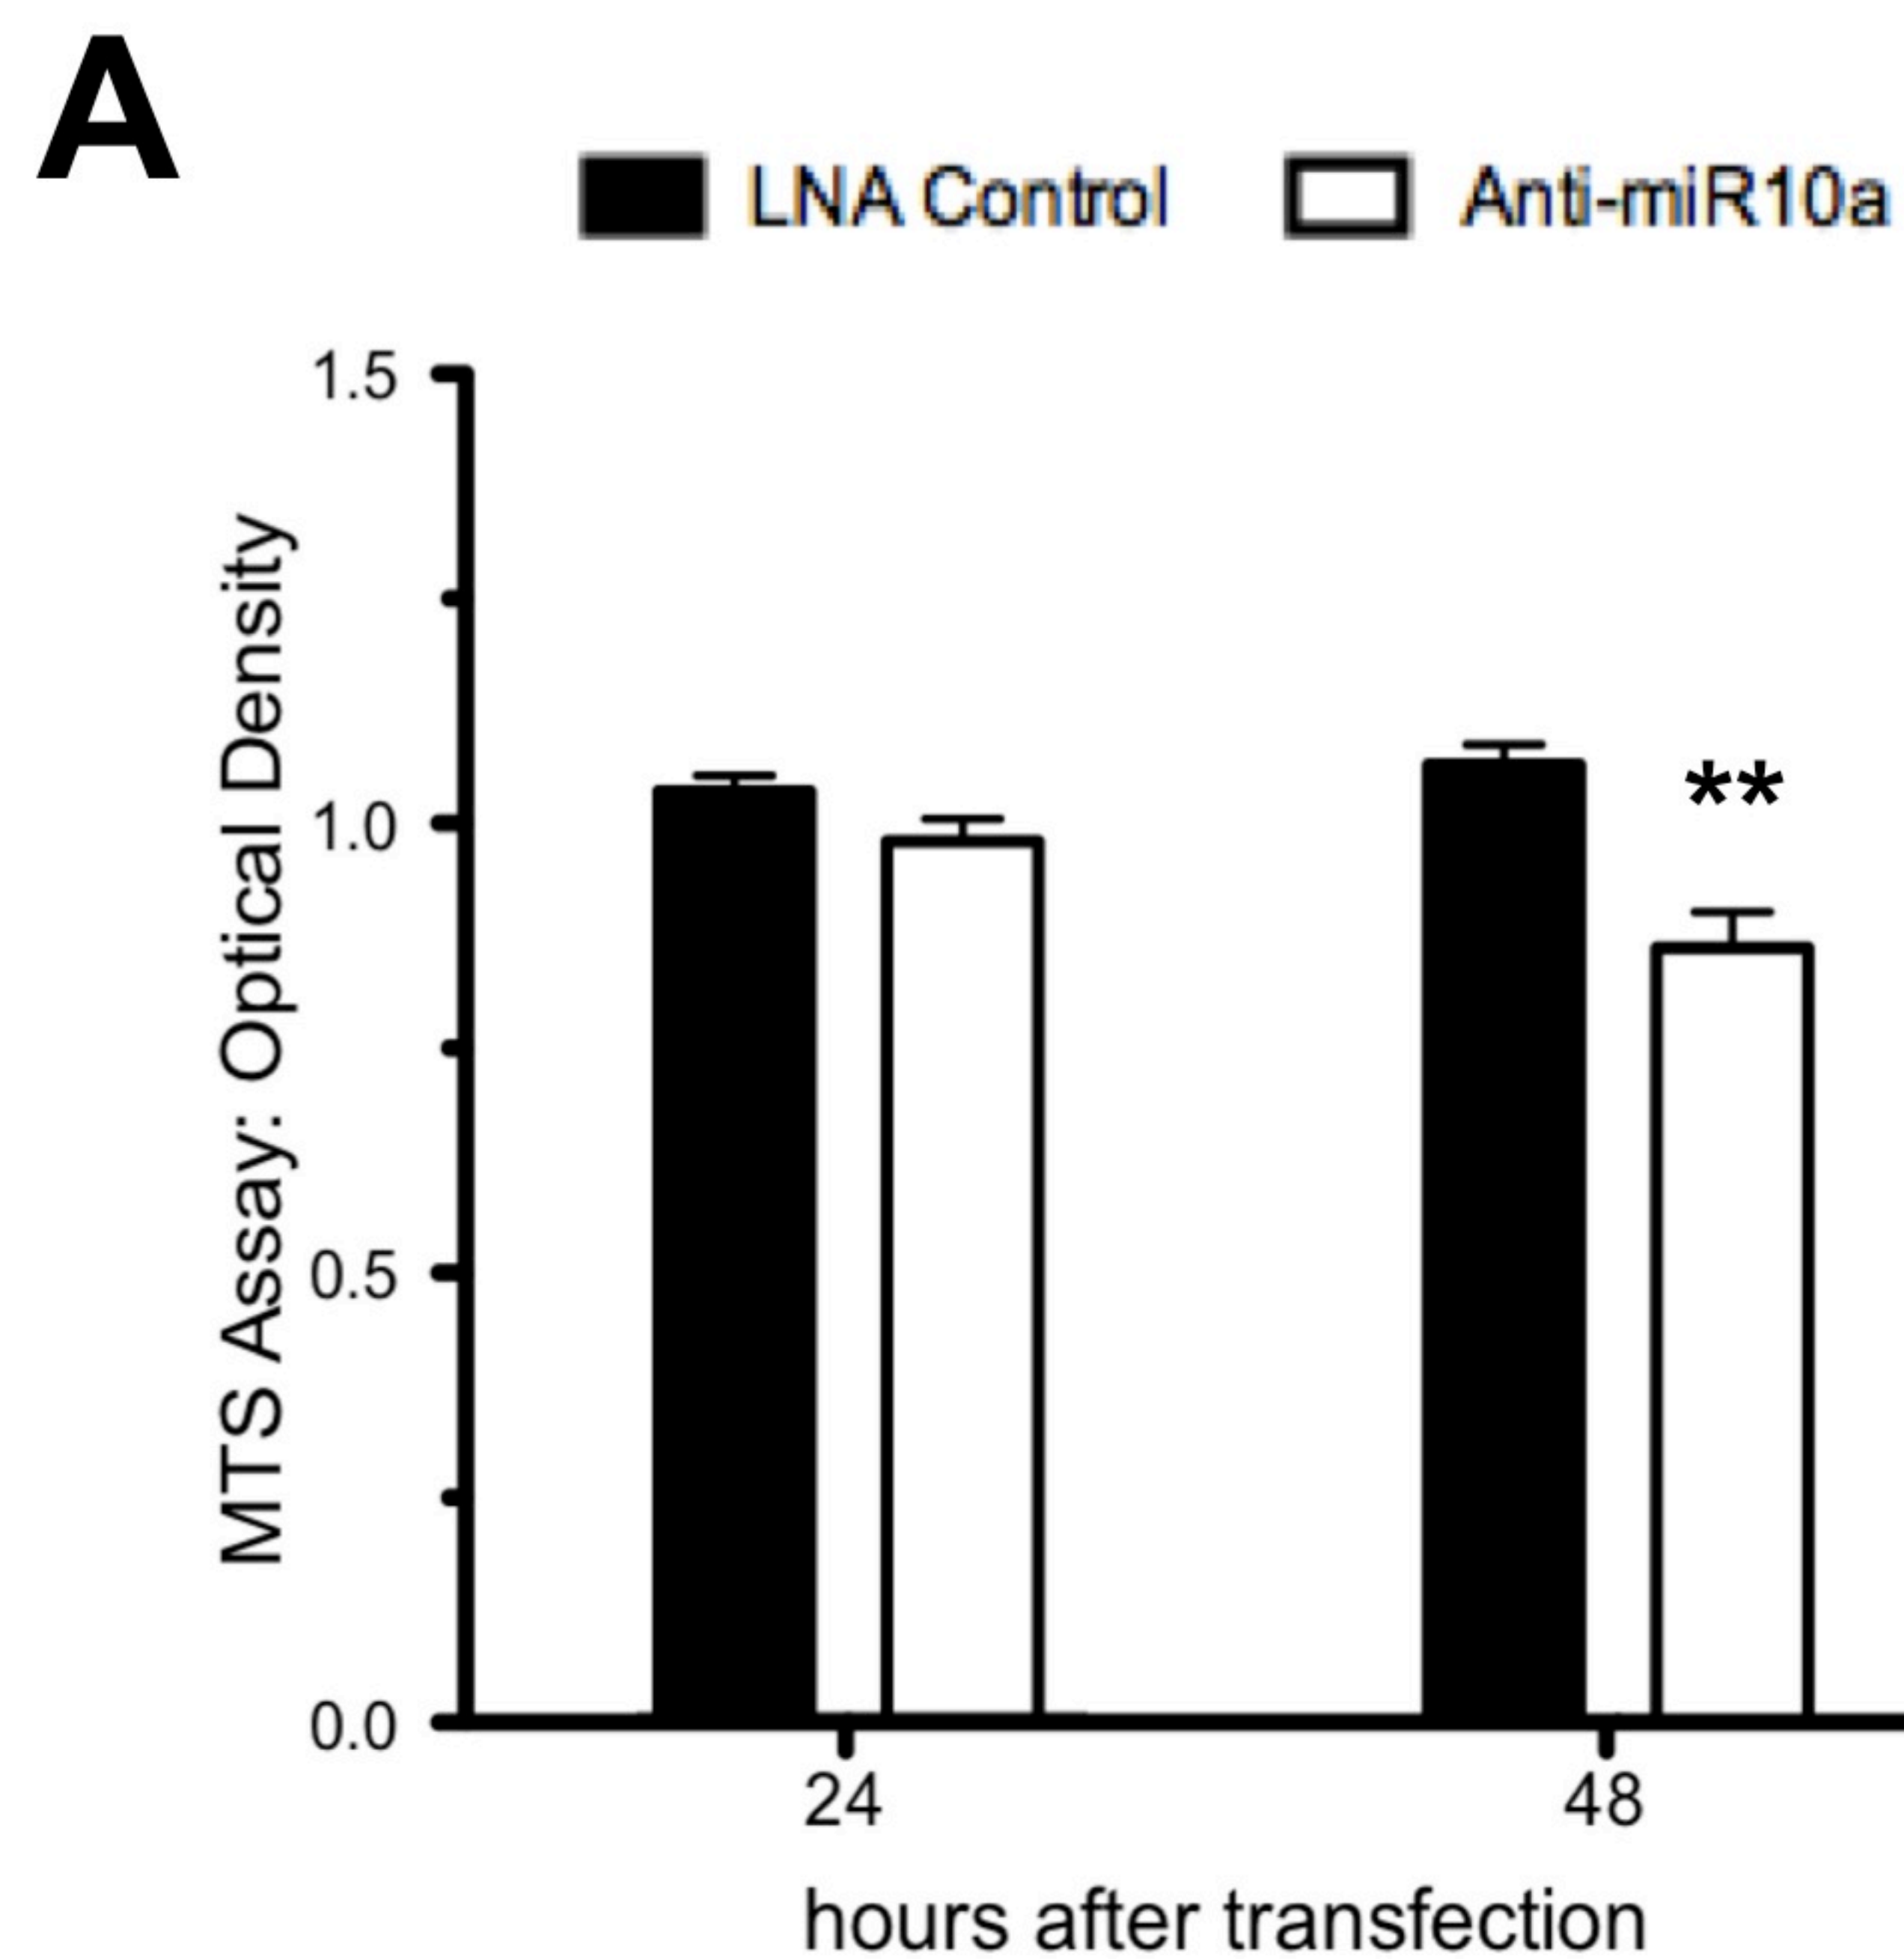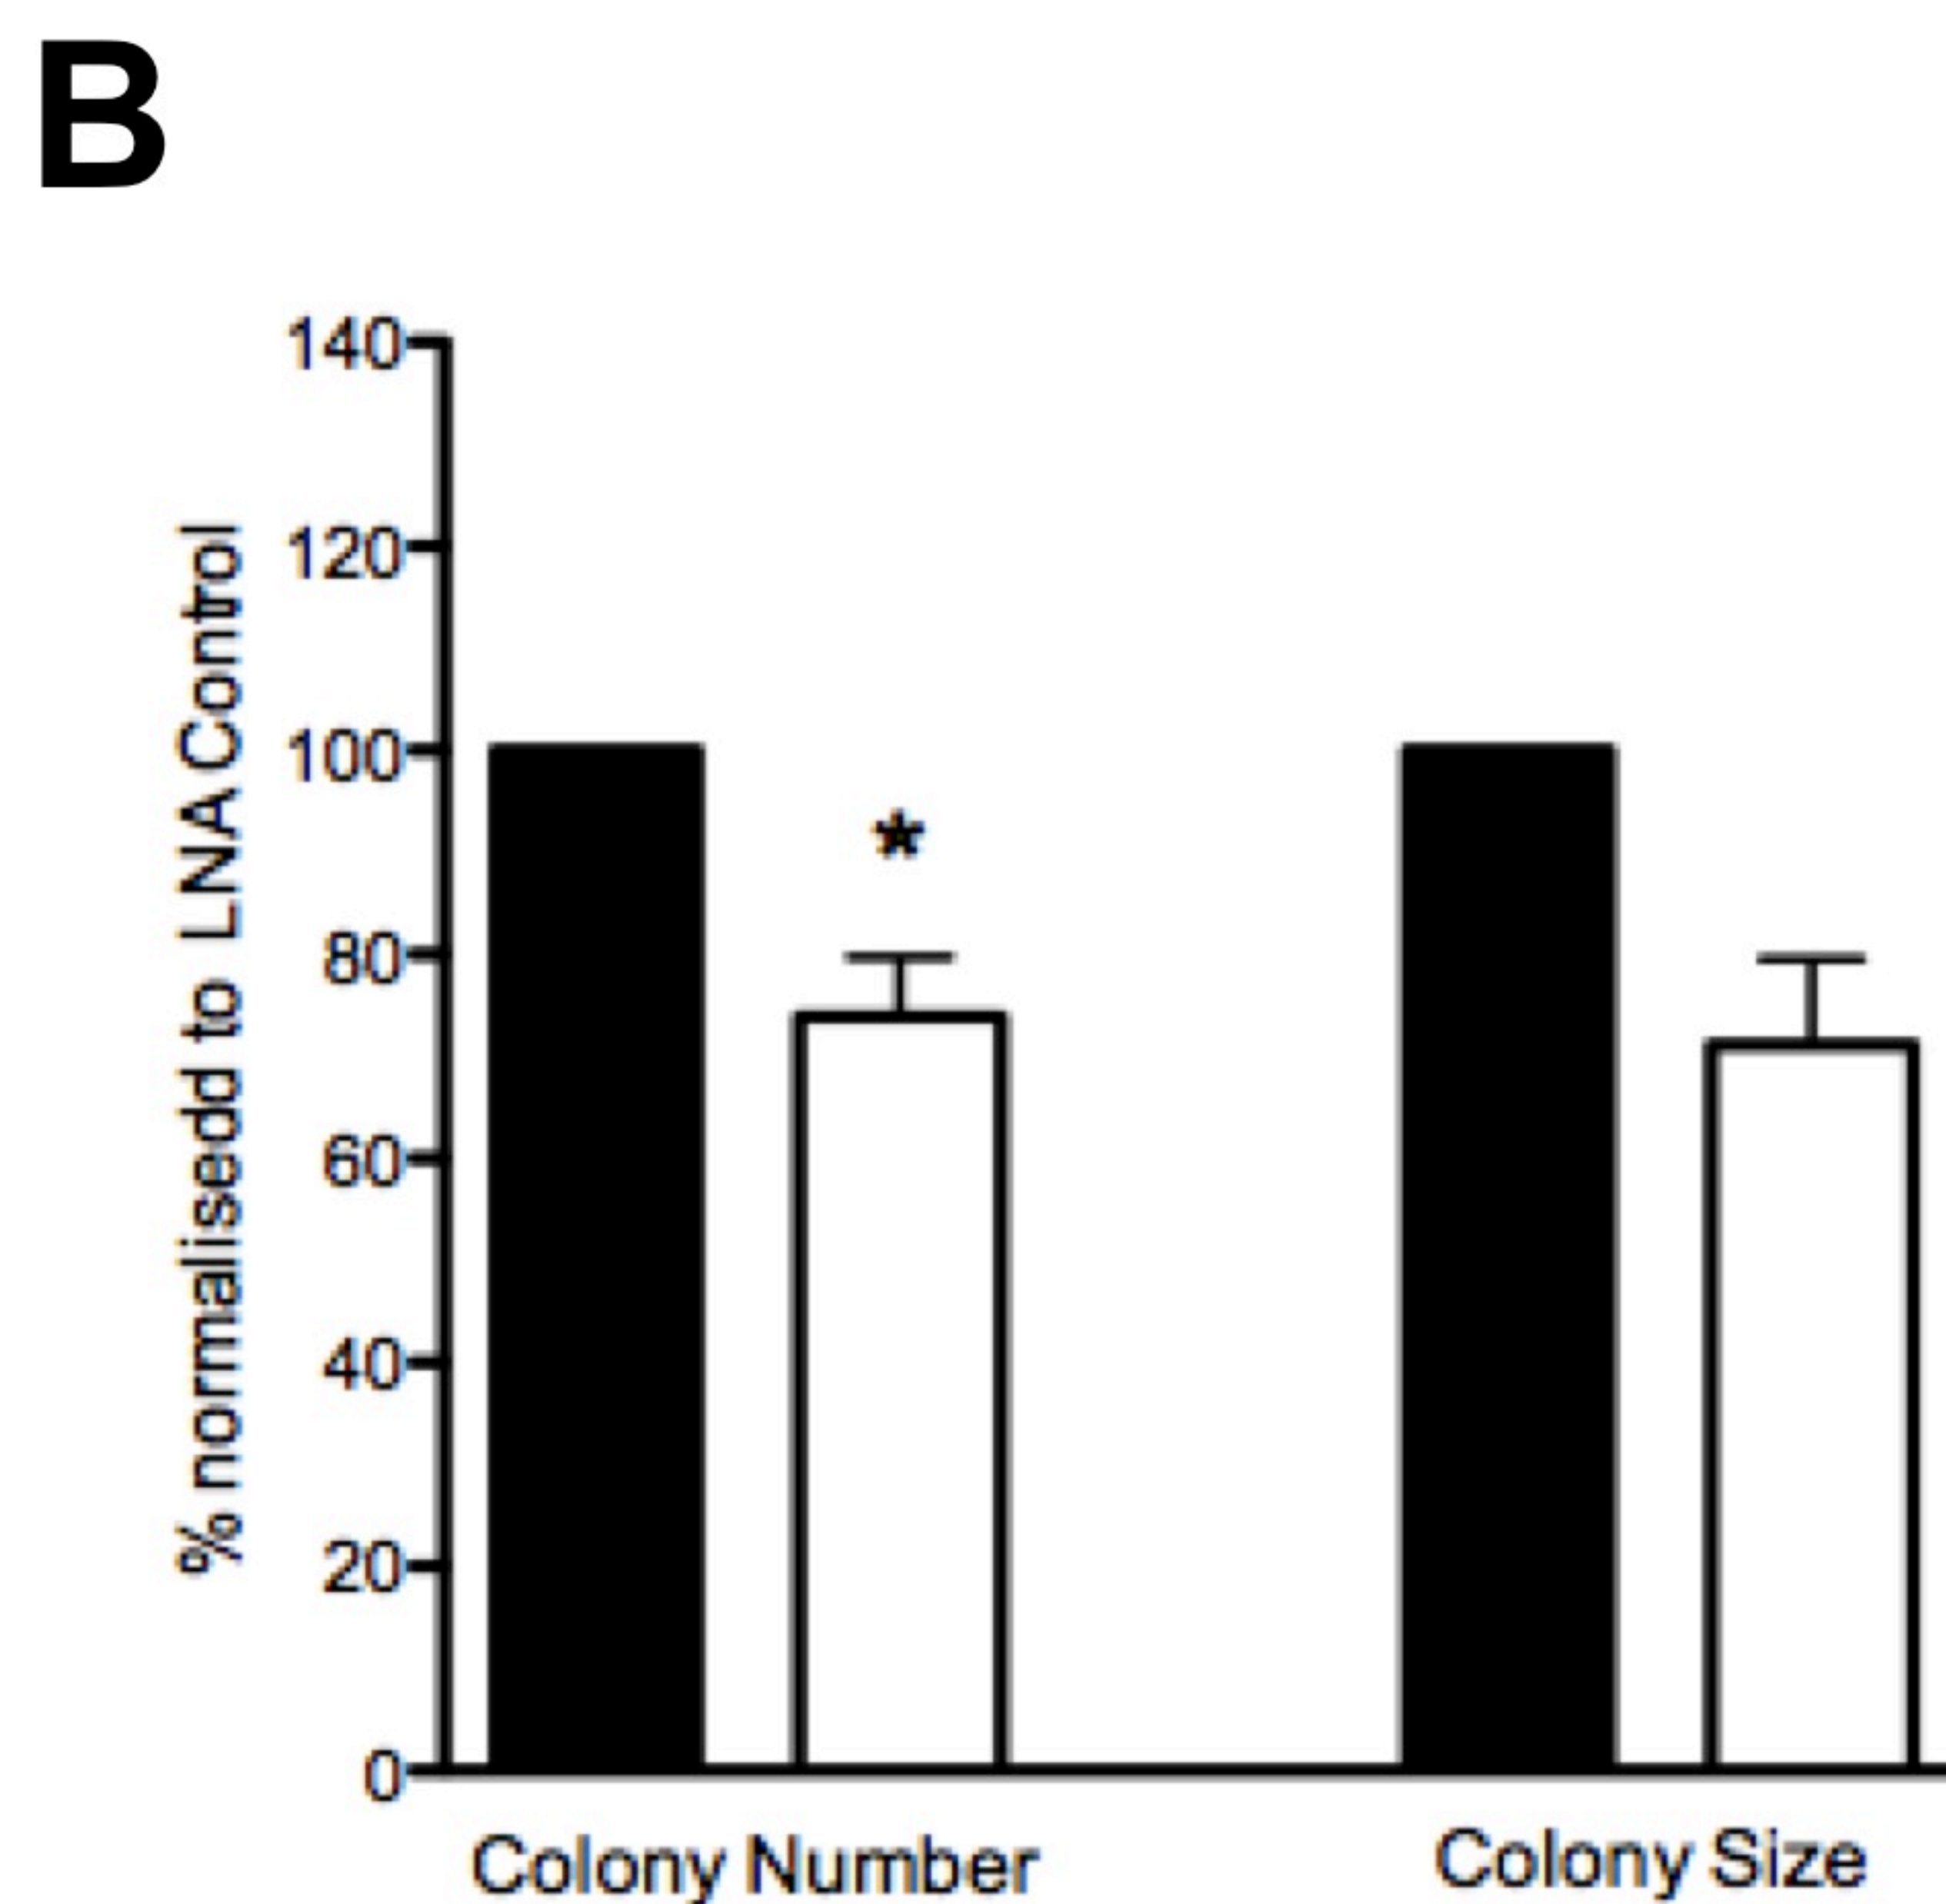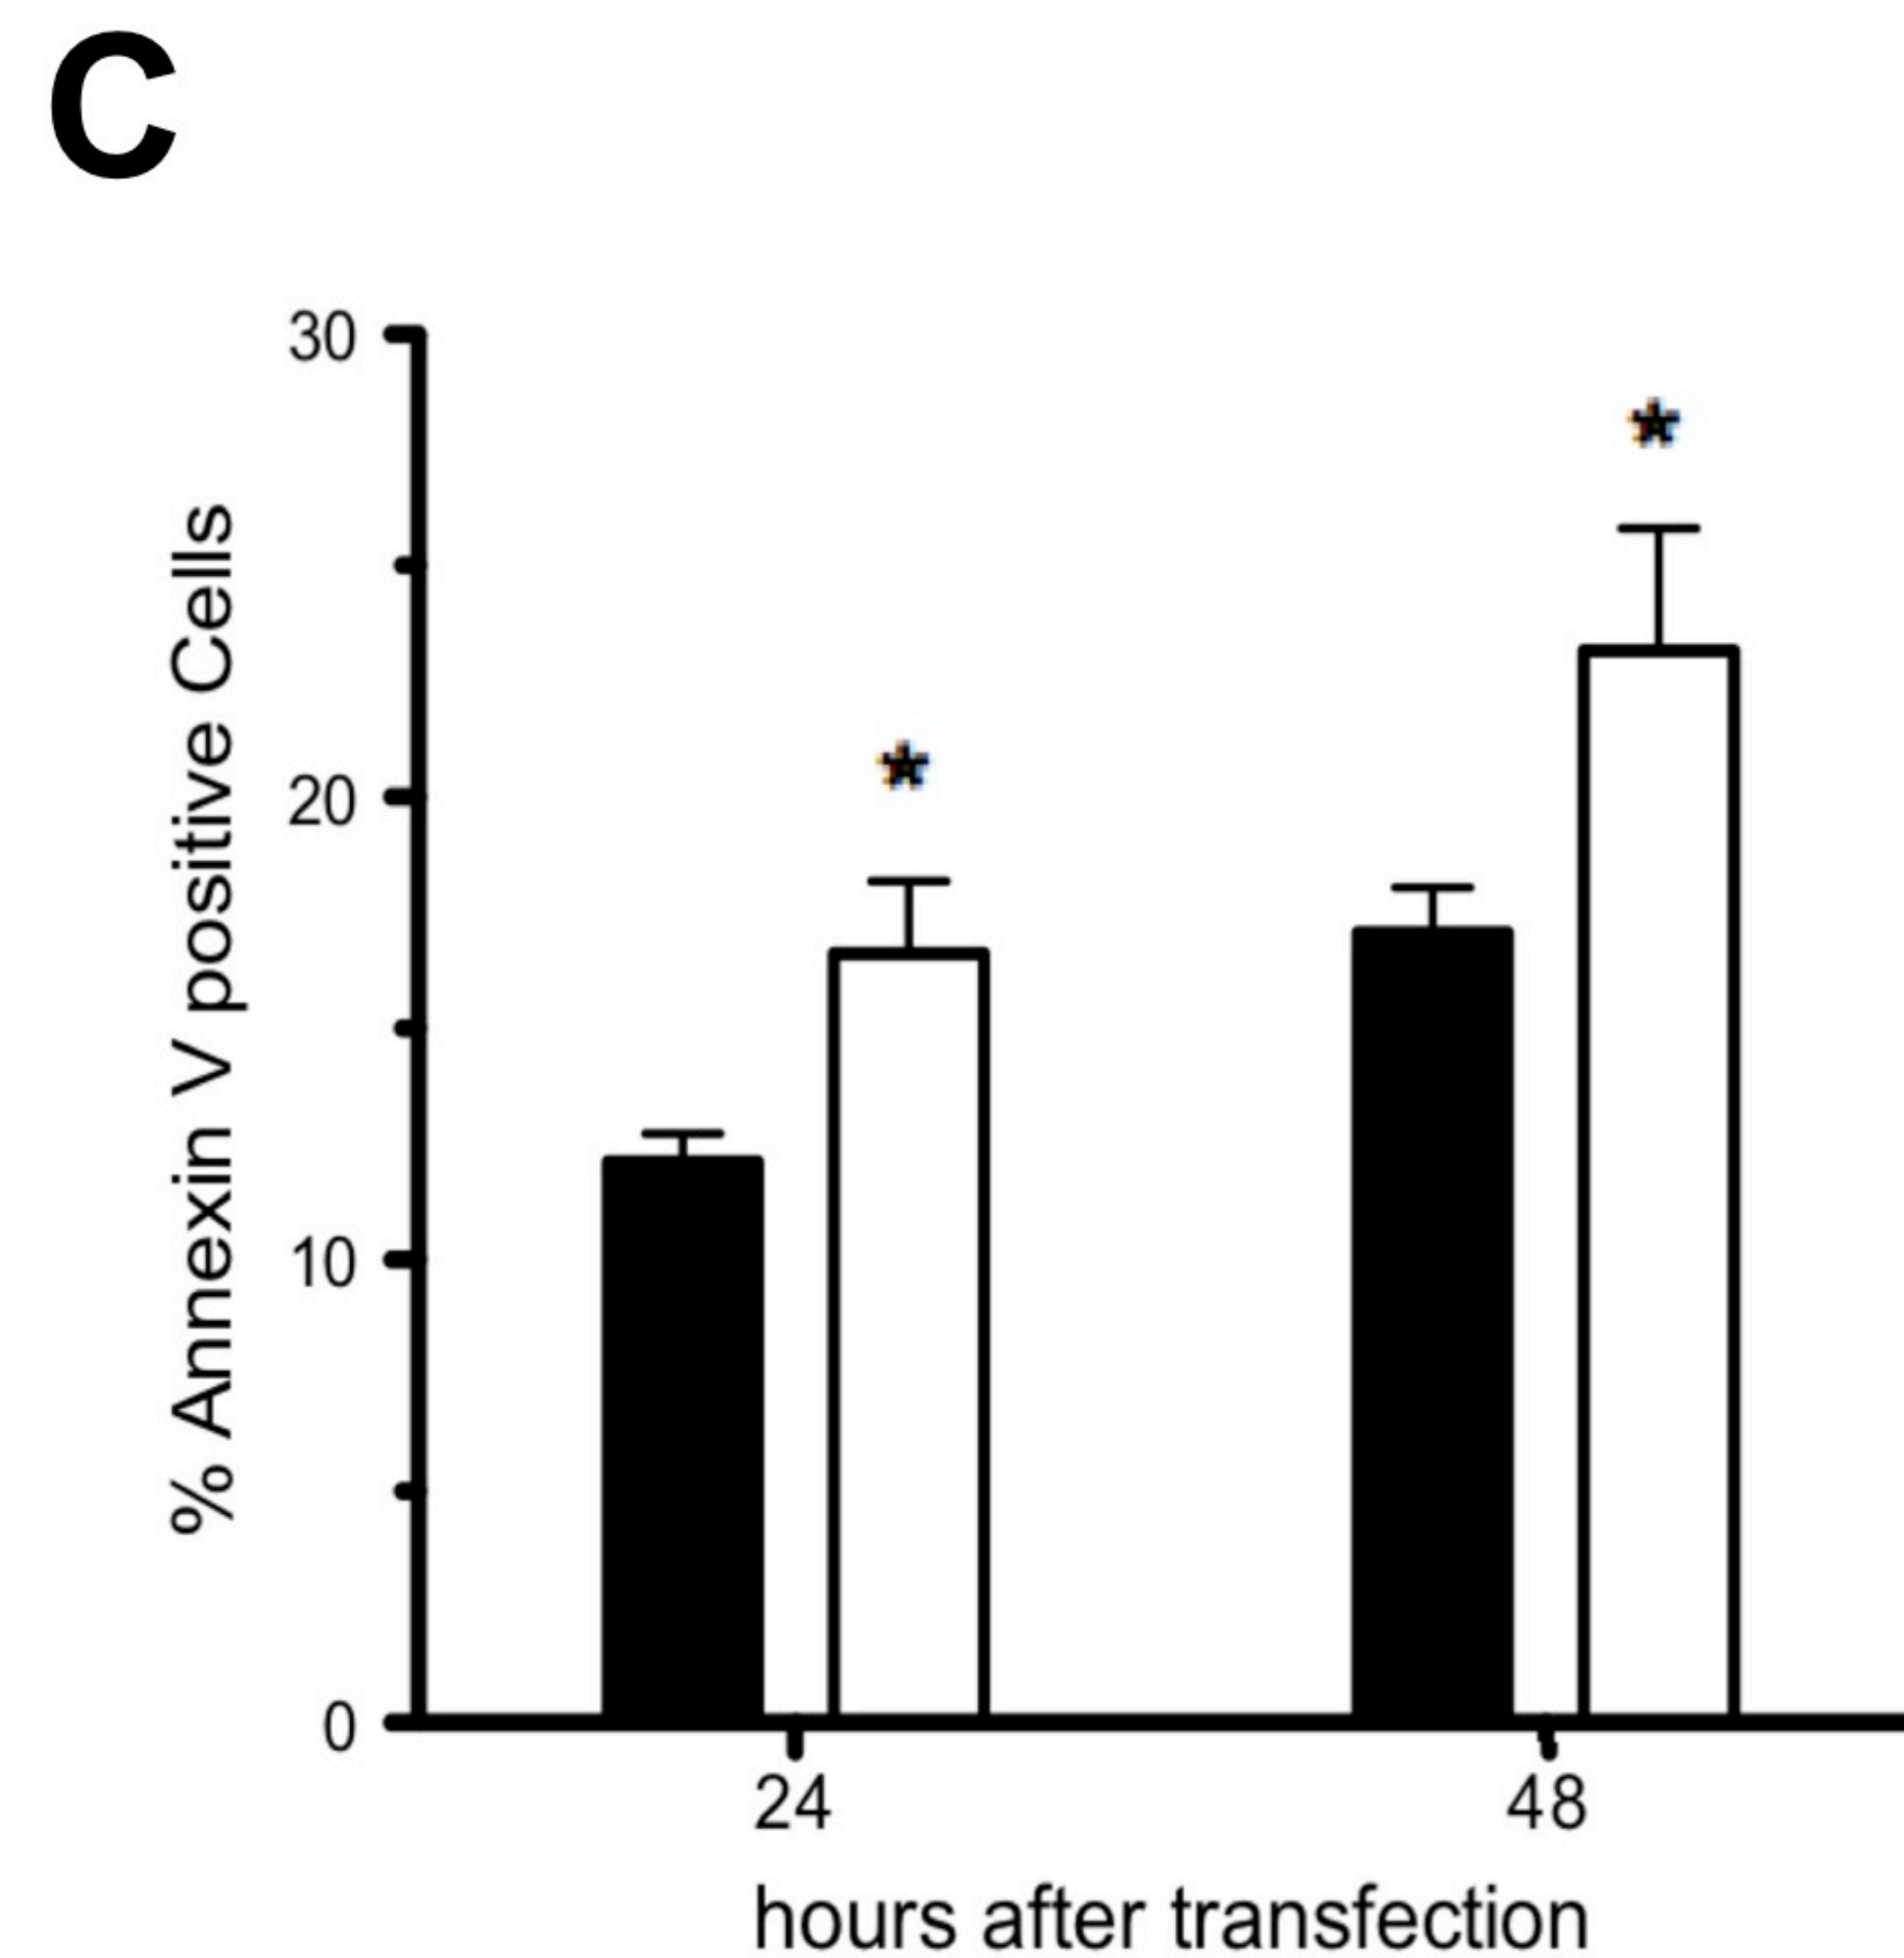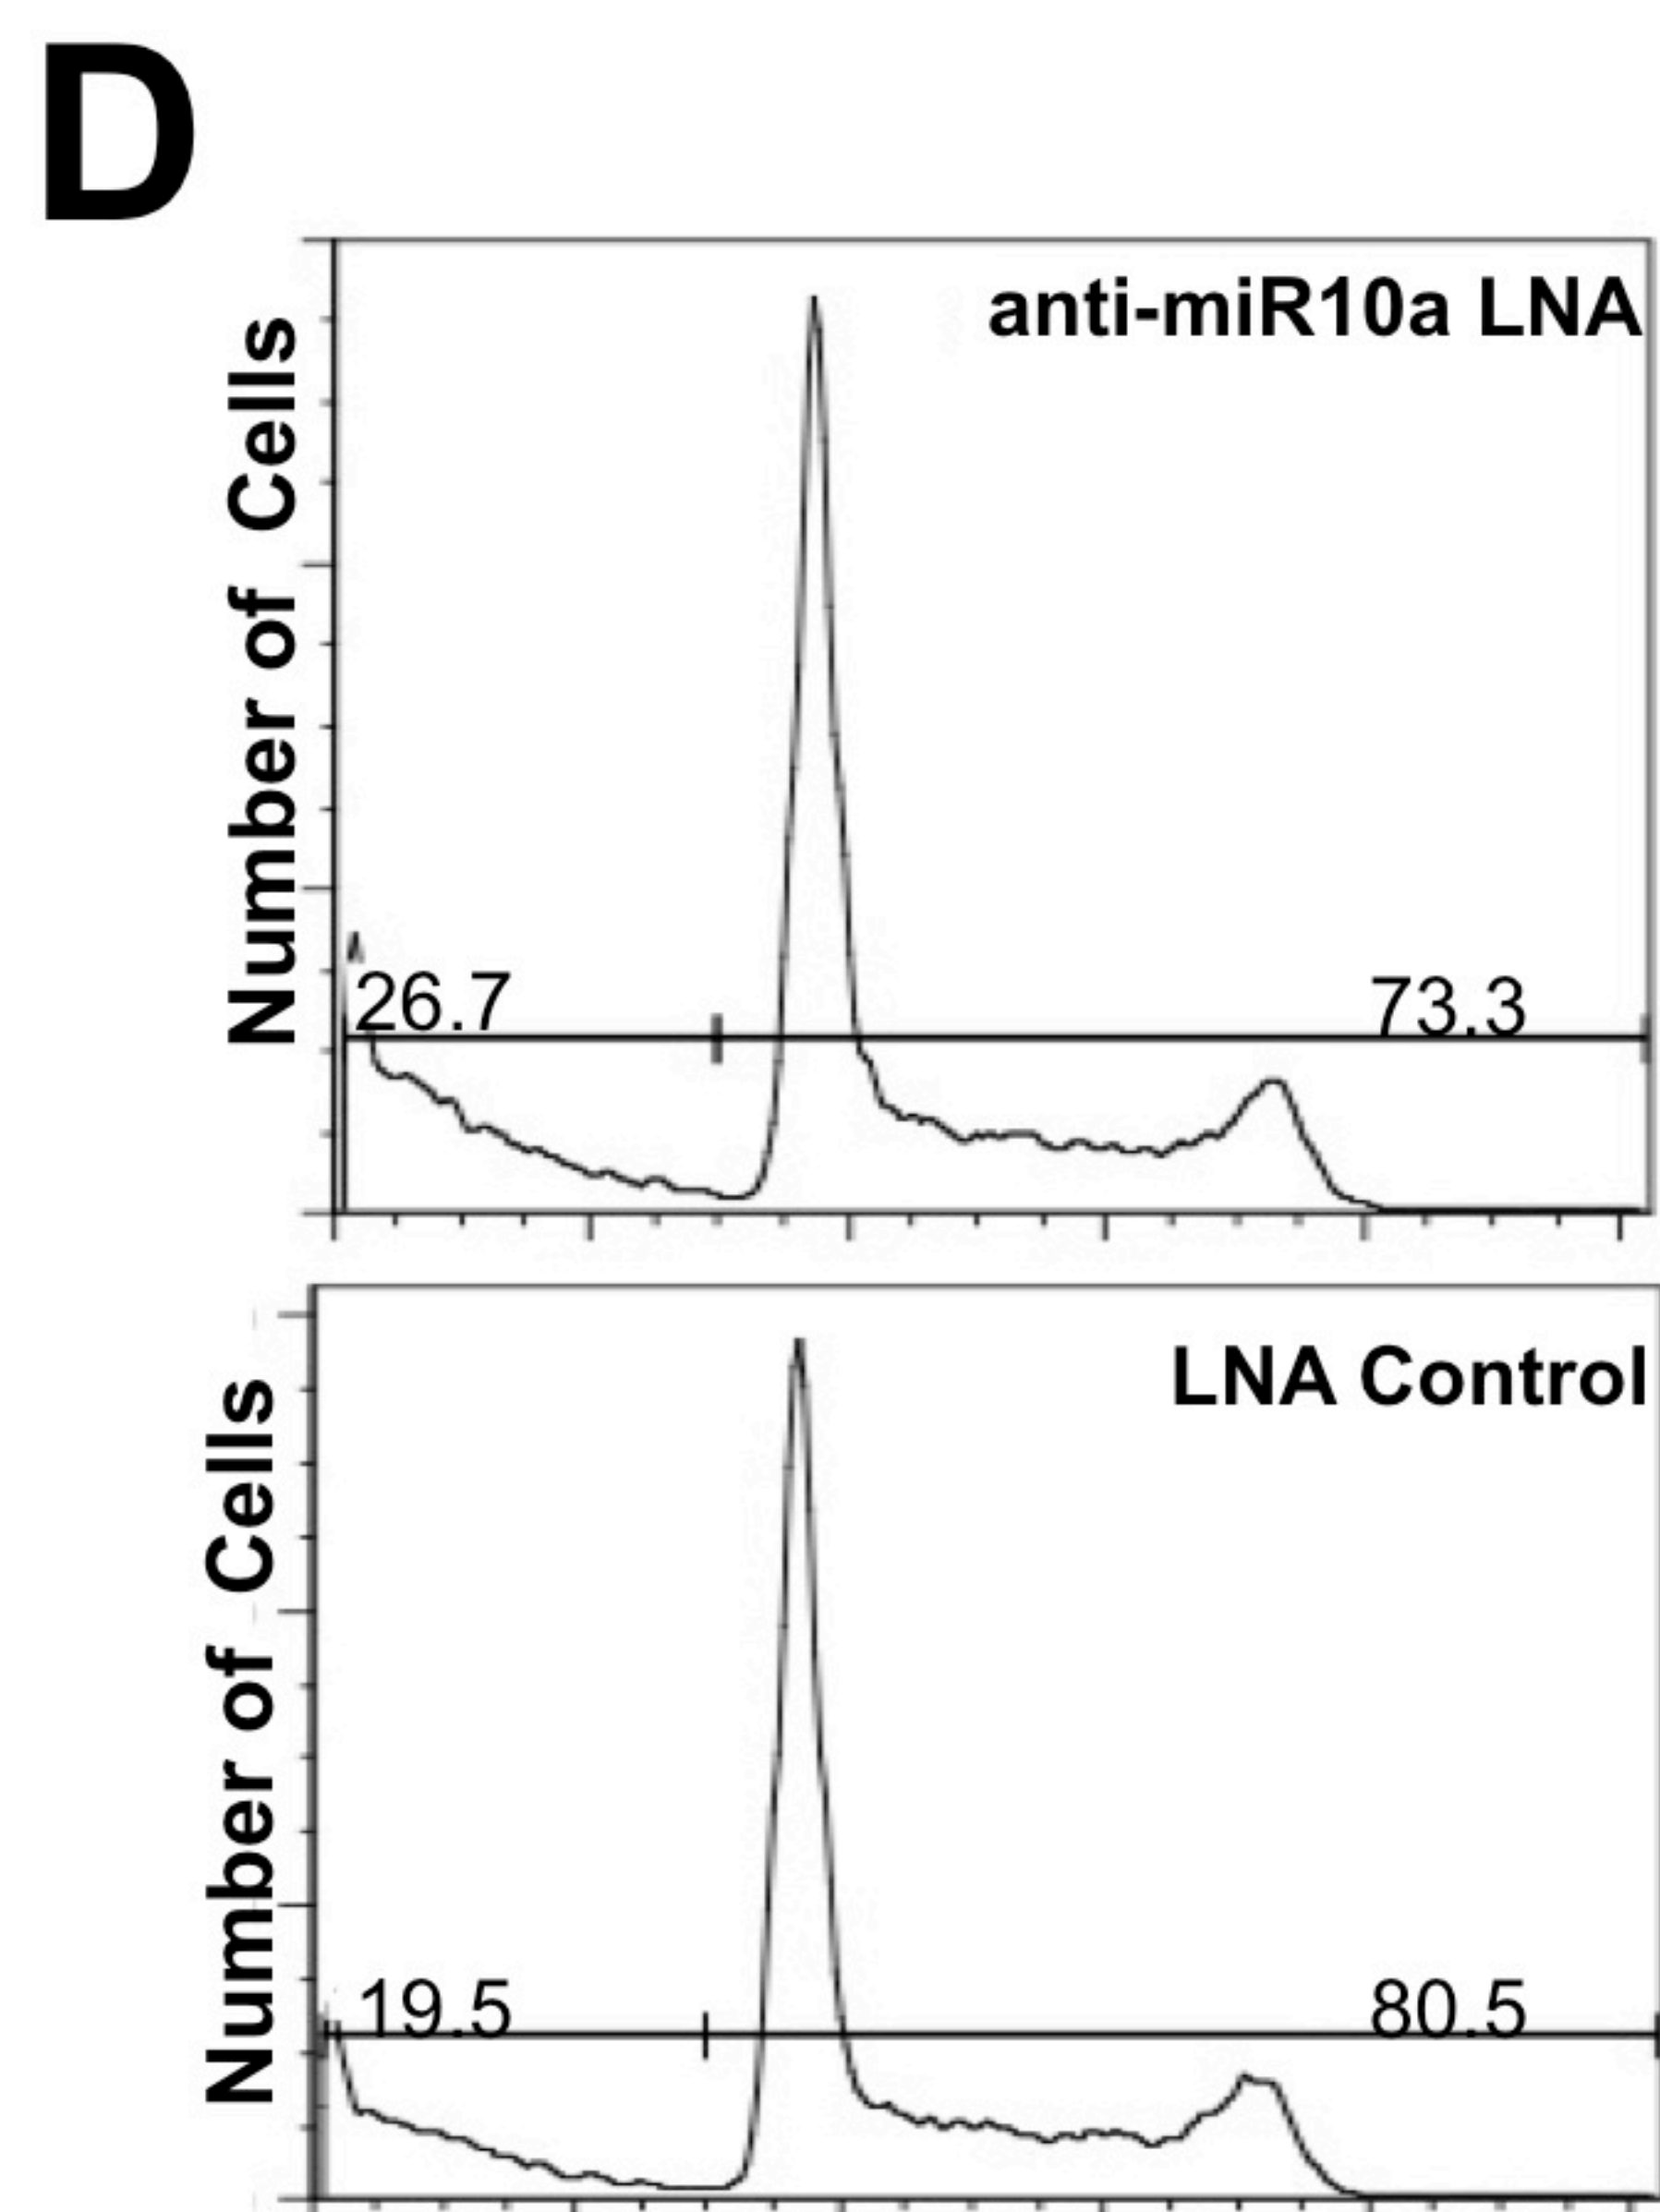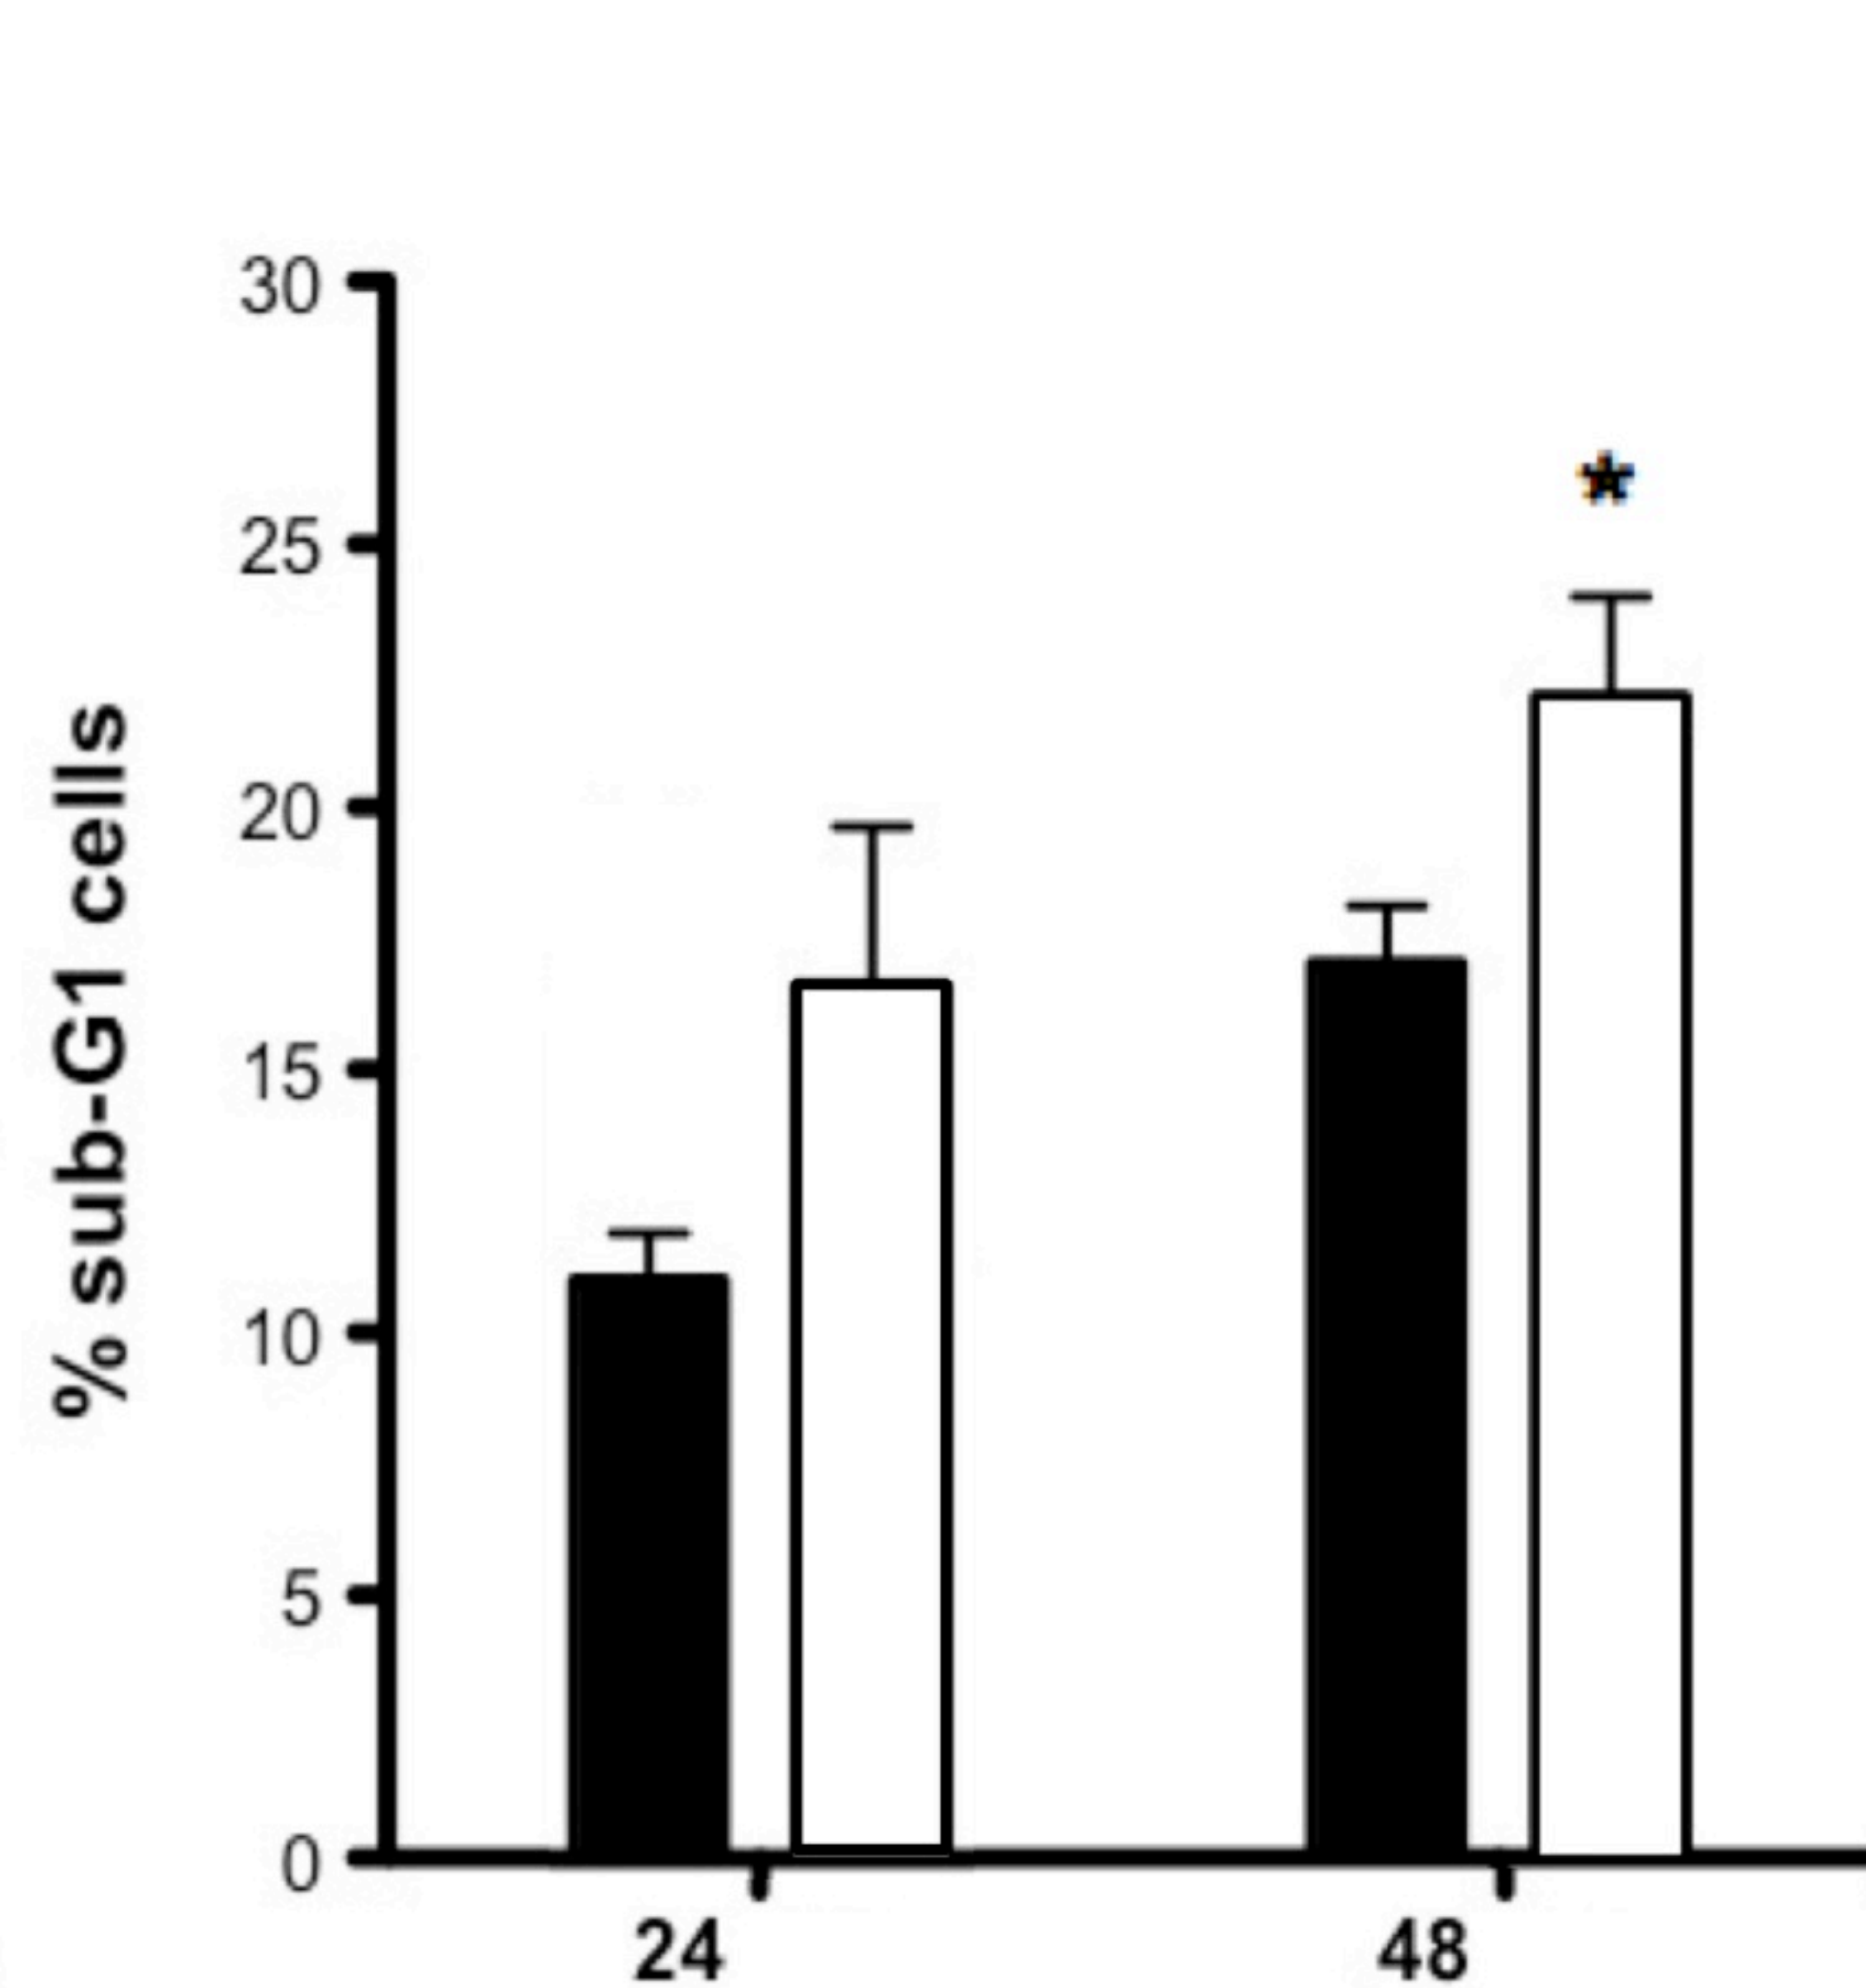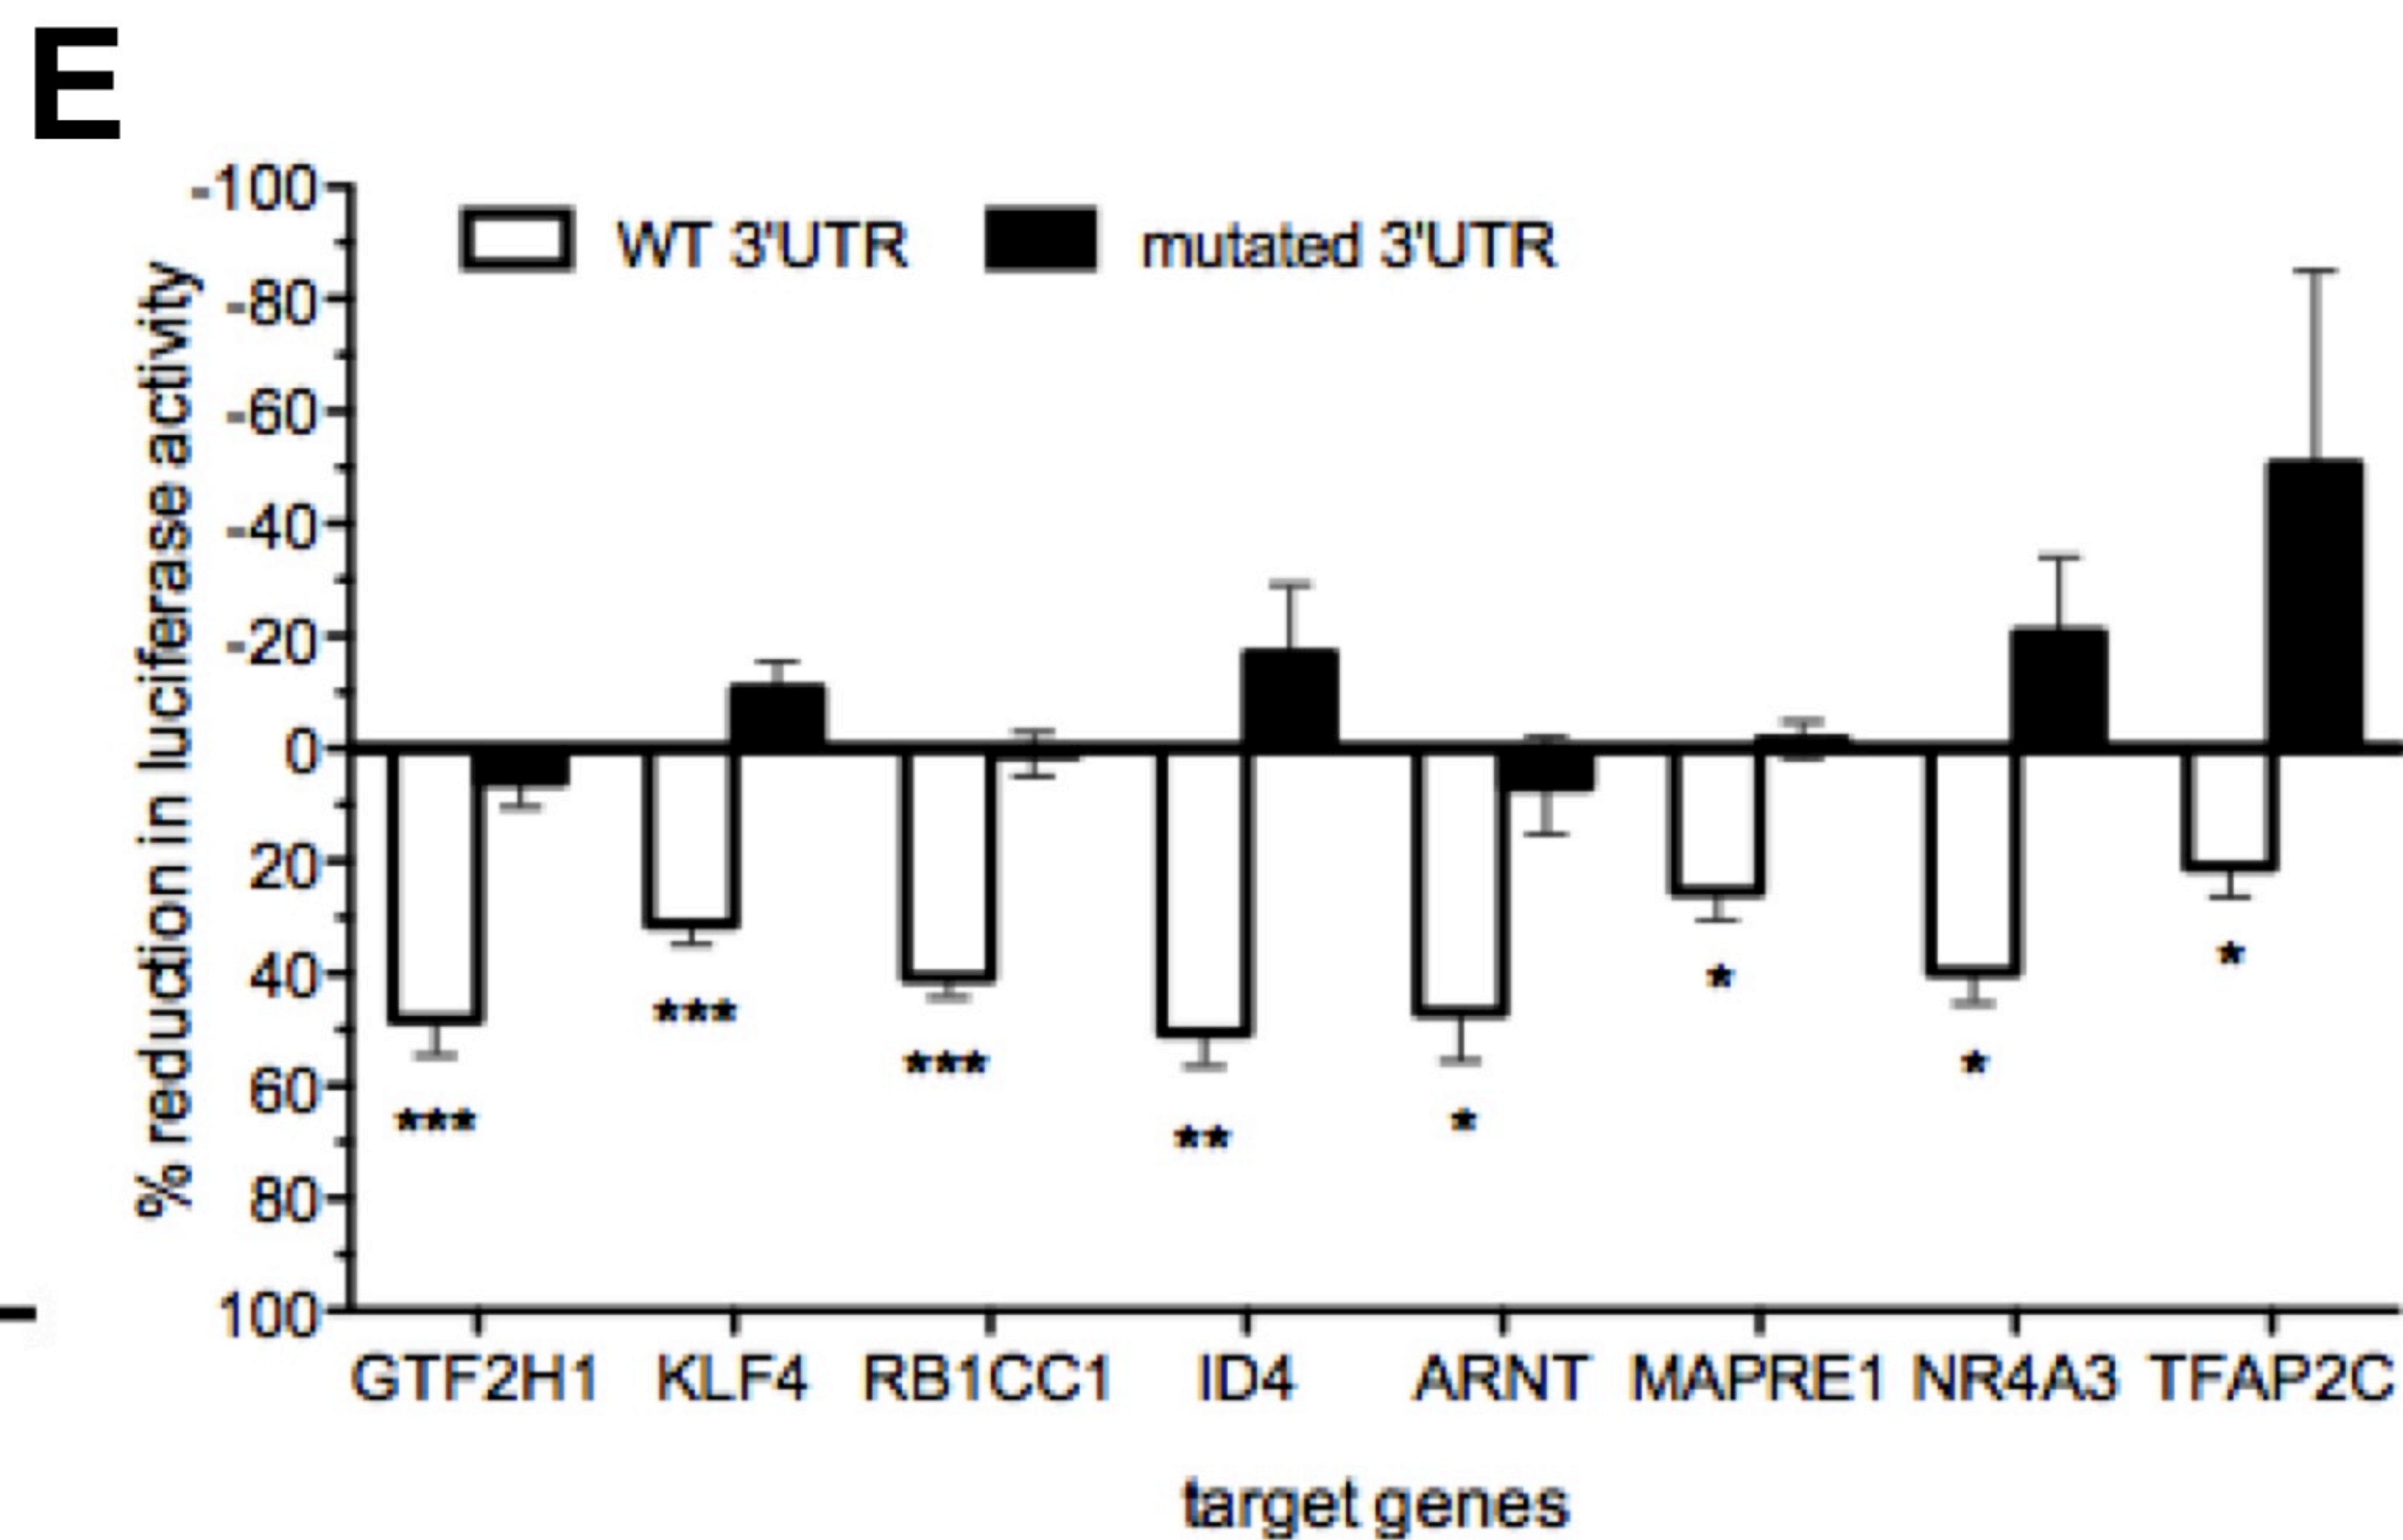

Supplement: MOESM6 [file 9552206]
